# Supplementary material for: Pharmacogenomic Study—A Pilot Study of the Effect of Pharmacogenomic Phenotypes on the Adequate Dosing of Verapamil for Migraine Prevention
Source: Research Square preprint supplement (doi:10.21203/rs.3.rs-2365333/v1), 2022-12-15
Supplement: Supplementary file 1 [file 05b1d8606cba329a4ac62f53.xlsx]

## Sheet: Sheet1
	Table 1. Associations between demographic factors, EMR CYP phenotypes and the individual minimum effective and maximum tolerable dose of verapamil per single variant linear regression
	Variable (N)	Number of subjects (%)	Mean Minimum Effective Dose (mg)	Mean Maximum Tolerable Dose (mg)
	P value
	All subjects (33)	33 (100 %)	178.2 ± 73.4	227.9 ± 97.7
			(20 to 320)	(20 to 480)
	Mean Age (years old) (33)	50.9 ± 12.8	0.87	0.203
	Sex (33)		0.943	0.273
	Female	26 (78.8 %)	177.7 ± 71.0	237.7 ± 98.0
	Male	7 (21.2 %)	180.0 ± 87.9	191.4 ± 94.4
	Smoking Status (31)		0.248	0.294
	Smoking	3 (9.7 %)	126.7 ± 110.2	166.7 ± 127.0
	Non-smoking	28 (90.3 %)	179.3 ± 70.0	231.4 ± 97.4
	Mean BMI (kg/m2) (33)	27.7 ± 4.7	0.195	0.18
	Race (33)		N/A	N/A
	White	32 (97.0 %)	176.2 ± 73.7	227.5 ± 99.3
	Hispanic	1 (3.0 %)	240	240
	CYP1A2 (33)		N/A	N/A
	Rapid	32 (97.0%)	176.3 ± 73.7	225.6 ± 98.4
	Intermediate-to-ultrarapid	1 (3.0%)	240	300
	CYP2B6 (8)		N/A	N/A
	Intermediate	6 (75 %)	120.0 ± 25.3	196.7 ± 51.3
	Normal	1 (12.5 %)	240	240
	Rapid	1 (12.5 %)	240	360
	CYP2C9 (33)		0.341	0.429
	Poor-to-intermediate	2 (5.3 %)	130.0 ± 155.6	130.0 ± 155.6
	Poor-to-normal	1 (2.6 %)	100	200
	Intermediate	4 (10.5 %)	230.0 ± 82.5	305.0 ± 130.0
	Intermediate-to-normal	7 (18.4 %)	194.3 ± 58.6	262.9 ± 121.9
	Normal	19 (63.2 %)	170.5 ± 67.8	210.5 ± 68.1
	CYP2D6 (33)		0.628	0.679
	Poor-to-intermediate	4 (12.1 %)	200.0 ± 103.3	240.0 ± 65.3
	Intermediate	9 (27.3 %)	193.3 ± 72.8	253.3 ± 133.8
	Intermediate-to-normal	5 (15.2 %)	188.0 ± 71.6	220.0 ± 66.3
	Normal	15 (45.5 %)	160.0 ± 69.7	212.0 ± 93.1
	CYP3A4 (33)		N/A	N/A
	Intermediate	1 (3.0 %)	240	480
	Intermediate-to-normal	1 (3.0 %)	60	120
	Normal	31 (93.9 %)	180.0 ± 71.7	223.2 ± 87.5
	CYP3A5 (33)		0.609	0.676
	Poor	26 (78.8 %)	174.6 ± 76.6	227.7 ± 92.5
	Intermediate	7 (21.2 %)	191.4 ± 63.1	228.6 ± 123.8
	CYP: cytochromes P450; EMR: electronic medical record; N/A: not applicable
