# Supplementary material for: Pharmacogenomic Study—A Pilot Study of the Effect of Pharmacogenomic Phenotypes on the Adequate Dosing of Verapamil for Migraine Prevention
Source: Research Square preprint supplement (doi:10.21203/rs.3.rs-2365333/v1), 2022-12-15
Supplement: Supplementary file 2 [file bba51b03a7bf8e936d93b30a.xlsx]

## Sheet: Sheet1
	Table 2. The allele frequency of the six CYP enzymes in our cohort compared to the admixed American population reported by Zhou et al 16
	Genotype (number of patients)		Allele frequency (%)
			Our cohort	Admixed American16
	CYP1A2 (33)
		*1	10.6	N/A
		*1A	4.5	N/A
		*1F (including one with novel variant)	83.3	73.3
		*1L	1.5	N/A
	CYP2B6 (8)
		*1	56.3	57.8
		*4	6.3	0.3
		*6	37.5	3
	CYP2C9 (33)
		*1	75.8	88.9
		*2 (including one with additional variant)	15.2	6.6
		*3	9	3.6
	CYP2D6 (33)
		*1	39.4	40.2
		*2A	18.2	(*2) 32.7
		*4	15.2	15.7
		*5	3	3
		*9	1.5	1.3
		*33	3	0.1
		*35	1.5	N/A
		*35A	6.1	N/A
		*41	10.6	3.5
		*68xN	3	N/A
	CYP3A4 (33)
		*1	97	96.9
		*8	1.5	< 0.1
		*22	1.5	2.6
	CYP3A5 (33)
		*1	10.6	17.5
		*3	89.4	79.7
	CYP: cytochromes P450; N/A: not applicable
